# Supplementary material
Source: MDPI journal article supplement (https://www.mdpi.com/2304-6732/11/1/38)
Supplement: s1 [file s1]

## Supplementary

### NaGdF<sub>4</sub>:Yb, Er, Tm upconversion nanoparticles for bioimaging in shortwave-infrared range: study of energy transfer processes and composition optimization

*Daria Pominova<sup>1,2</sup>, Vera Proydakova<sup>1</sup>, Igor Romanishkin<sup>1</sup>, Sergei Kuznetsov<sup>1</sup>, Kirill Linkov<sup>1</sup>, Nataliya Tabachkova<sup>1,3</sup>, Anastasia Ryabova<sup>1,2\*</sup>*

The upconversion luminescence efficiency was calculated for the visible range, 500-700 nm, using the method described in [1]. Pumping power density was estimated to be 1 W/cm<sup>2</sup>.

Table s1. The upconversion luminescence efficiency for Yb-Er-Tm tri-doped  $\beta$ -NaGdF<sub>4</sub> nanoparticles, calculated for the visible range.

| Sample                                                                                                   | Ben, % |
|----------------------------------------------------------------------------------------------------------|--------|
| NaGdF <sub>4</sub> :Yb-Er-Tm (10:1:0.5)                                                                  | 0.05   |
| NaGdF <sub>4</sub> :Yb-Er-Tm (10:1:0.5)@NaYF <sub>4</sub>                                                | 0.49   |
| NaGdF <sub>4</sub> :Yb-Er-Tm (10:1:1)                                                                    | 0.05   |
| NaGdF <sub>4</sub> :Yb-Er (20:2)                                                                         | 0.08   |
| NaGdF <sub>4</sub> :Yb-Er (20:2)@NaGdF <sub>4</sub> :Yb-Tm (30:0.5)                                      | 0.20   |
| NaGdF <sub>4</sub> :Yb-Er (20:2)@NaGdF <sub>4</sub> :Yb-Tm (30:0.5)@NaYF <sub>4</sub>                    | 0.46   |
| NaGdF <sub>4</sub> :Yb-Tm (30:0.5)                                                                       | 0.01   |
| NaGdF <sub>4</sub> :Yb-Tm (30:0.5)@NaGdF <sub>4</sub> :Yb-Er (20:2)                                      | 0.04   |
| NaGdF <sub>4</sub> :Yb-Tm (30:0.5)@NaGdF <sub>4</sub> :Yb-Er (20:2)@NaYF <sub>4</sub>                    | 0.20   |
| NaGdF <sub>4</sub> :Yb-Tm (30:0.5)                                                                       | 0.01   |
| NaGdF <sub>4</sub> :Yb-Tm (30:0.5)@NaYF <sub>4</sub>                                                     | 0.06   |
| NaGdF <sub>4</sub> :Yb-Tm (30:0.5)@NaYF <sub>4</sub> @NaGdF <sub>4</sub> :Yb-Er (20:2)                   | 0.08   |
| NaGdF <sub>4</sub> :Yb-Tm (30:0.5)@NaYF <sub>4</sub> @NaGdF <sub>4</sub> :Yb-Er (20:2)@NaYF <sub>4</sub> | 0.17   |

[1] A.V. Ryabova, D.V. Pominova, V.A. Krut'ko, M.G. Komova, V.B. Loschenov. Spectroscopic research of upconversion nanomaterials based on complex oxide compounds doped with rare-earth ion pairs: benefit for cancer diagnostics by upconversion fluorescence and radio sensitive methods. // Photon Lasers Med 2013. 2(2). P. 117–128.]:
